# Supplementary material for: Heterogeneous Distribution of Phospholipid Molecular Species in the Surface Culture of Flammulina velutipes: New Facts about Lipids Containing α-Linolenic Fatty Acid
Source: MDPI journal article supplement (doi:10.3390/jof9010102), 2023-01-12
Supplement: s1 [file s1]

**Table S1.** SWATH settings

| Event# | +/- | Type  | Start (min) | End (min) | Precursor Ion m/z | TOF Start m/z | TOF End m/z | CE | CE Spread (+/-) | Event Time (s) | Q1 Resolution | Interface Voltage (kV) |
|--------|-----|-------|-------------|-----------|-------------------|---------------|-------------|----|-----------------|----------------|---------------|------------------------|
| 1      | +   | MS    | 2           | 11        |                   | 640           | 1050        |    |                 | 0.1            |               | 4                      |
| 2      | +   | MS/MS | 2           | 11        | 647.05            | 150           | 1050        | 30 | 5               | 0.03           | 14.1          | 4                      |
| 3      | +   | MS/MS | 2           | 11        | 661.15            | 150           | 1050        | 30 | 5               | 0.03           | 14.1          | 4                      |
| 4      | +   | MS/MS | 2           | 11        | 675.25            | 150           | 1050        | 30 | 5               | 0.03           | 14.1          | 4                      |
| 5      | +   | MS/MS | 2           | 11        | 689.35            | 150           | 1050        | 30 | 5               | 0.03           | 14.1          | 4                      |
| 6      | +   | MS/MS | 2           | 11        | 703.45            | 150           | 1050        | 30 | 5               | 0.03           | 14.1          | 4                      |
| 7      | +   | MS/MS | 2           | 11        | 717.55            | 150           | 1050        | 30 | 5               | 0.03           | 14.1          | 4                      |
| 8      | +   | MS/MS | 2           | 11        | 731.65            | 150           | 1050        | 30 | 5               | 0.03           | 14.1          | 4                      |
| 9      | +   | MS/MS | 2           | 11        | 745.75            | 150           | 1050        | 30 | 5               | 0.03           | 14.1          | 4                      |
| 10     | +   | MS/MS | 2           | 11        | 759.85            | 150           | 1050        | 30 | 5               | 0.03           | 14.1          | 4                      |
| 11     | +   | MS/MS | 2           | 11        | 773.95            | 150           | 1050        | 30 | 5               | 0.03           | 14.1          | 4                      |
| 12     | +   | MS/MS | 2           | 11        | 788.05            | 150           | 1050        | 30 | 5               | 0.03           | 14.1          | 4                      |
| 13     | +   | MS/MS | 2           | 11        | 802.15            | 150           | 1050        | 30 | 5               | 0.03           | 14.1          | 4                      |
| 14     | +   | MS/MS | 2           | 11        | 816.25            | 150           | 1050        | 30 | 5               | 0.03           | 14.1          | 4                      |
| 15     | +   | MS/MS | 2           | 11        | 830.35            | 150           | 1050        | 30 | 5               | 0.03           | 14.1          | 4                      |
| 16     | +   | MS/MS | 2           | 11        | 844.45            | 150           | 1050        | 30 | 5               | 0.03           | 14.1          | 4                      |
| 17     | +   | MS/MS | 2           | 11        | 858.55            | 150           | 1050        | 30 | 5               | 0.03           | 14.1          | 4                      |
| 18     | +   | MS/MS | 2           | 11        | 872.65            | 150           | 1050        | 30 | 5               | 0.03           | 14.1          | 4                      |
| 19     | +   | MS/MS | 2           | 11        | 886.75            | 150           | 1050        | 30 | 5               | 0.03           | 14.1          | 4                      |
| 20     | +   | MS/MS | 2           | 11        | 900.85            | 150           | 1050        | 30 | 5               | 0.03           | 14.1          | 4                      |
| 21     | +   | MS/MS | 2           | 11        | 914.95            | 150           | 1050        | 30 | 5               | 0.03           | 14.1          | 4                      |
| 22     | +   | MS/MS | 2           | 11        | 929.05            | 150           | 1050        | 30 | 5               | 0.03           | 14.1          | 4                      |
| 23     | +   | MS/MS | 2           | 11        | 943.15            | 150           | 1050        | 30 | 5               | 0.03           | 14.1          | 4                      |
| 24     | +   | MS/MS | 2           | 11        | 957.25            | 150           | 1050        | 30 | 5               | 0.03           | 14.1          | 4                      |
| 25     | +   | MS/MS | 2           | 11        | 971.35            | 150           | 1050        | 30 | 5               | 0.03           | 14.1          | 4                      |
| 26     | +   | MS/MS | 2           | 11        | 985.45            | 150           | 1050        | 30 | 5               | 0.03           | 14.1          | 4                      |

|    |   |       |   |    |         |     |      |    |   |      |      |   |
|----|---|-------|---|----|---------|-----|------|----|---|------|------|---|
| 27 | + | MS/MS | 2 | 11 | 999.55  | 150 | 1050 | 30 | 5 | 0.03 | 14.1 | 4 |
| 28 | + | MS/MS | 2 | 11 | 1013.65 | 150 | 1050 | 30 | 5 | 0.03 | 14.1 | 4 |
| 29 | + | MS/MS | 2 | 11 | 1027.75 | 150 | 1050 | 30 | 5 | 0.03 | 14.1 | 4 |
| 30 | + | MS/MS | 2 | 11 | 1041.85 | 150 | 1050 | 30 | 5 | 0.03 | 14.1 | 4 |
