# Supplementary material for: Heterogeneous Distribution of Phospholipid Molecular Species in the Surface Culture of Flammulina velutipes: New Facts about Lipids Containing α-Linolenic Fatty Acid
Source: MDPI journal article supplement (doi:10.3390/jof9010102), 2023-01-12

A. The example of total ion chromatogram of *F. velutipes* phosphatidylcholine fraction

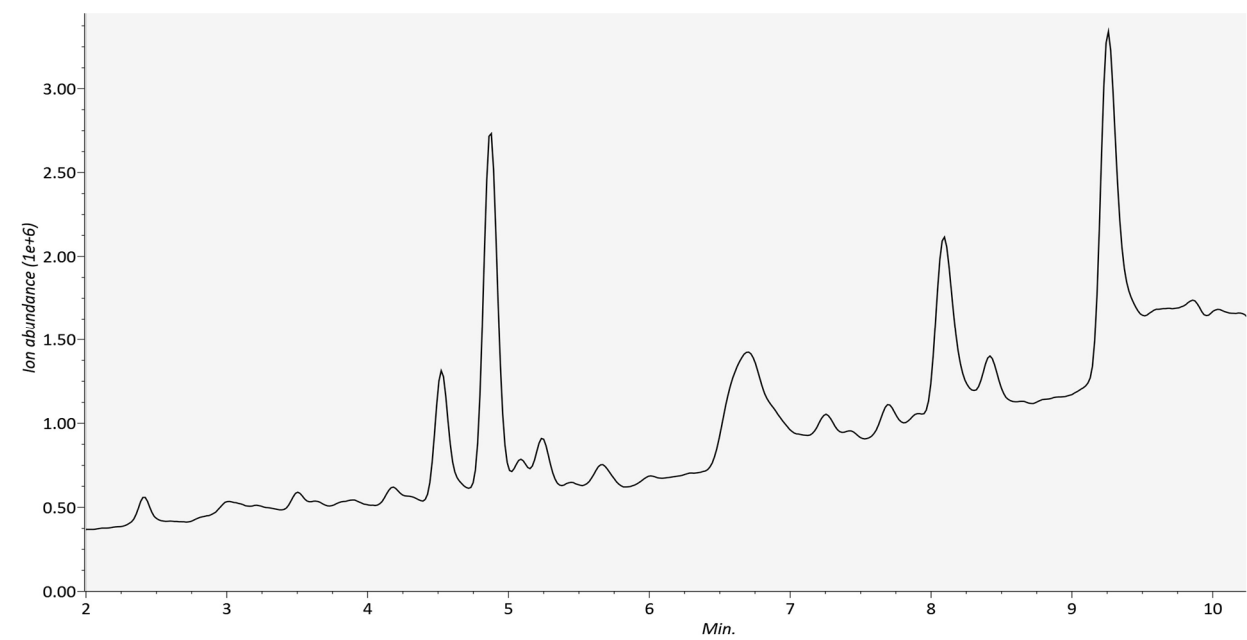

B. The example of extracted ion chromatogram of *F. velutipes* phosphatidylcholine fraction

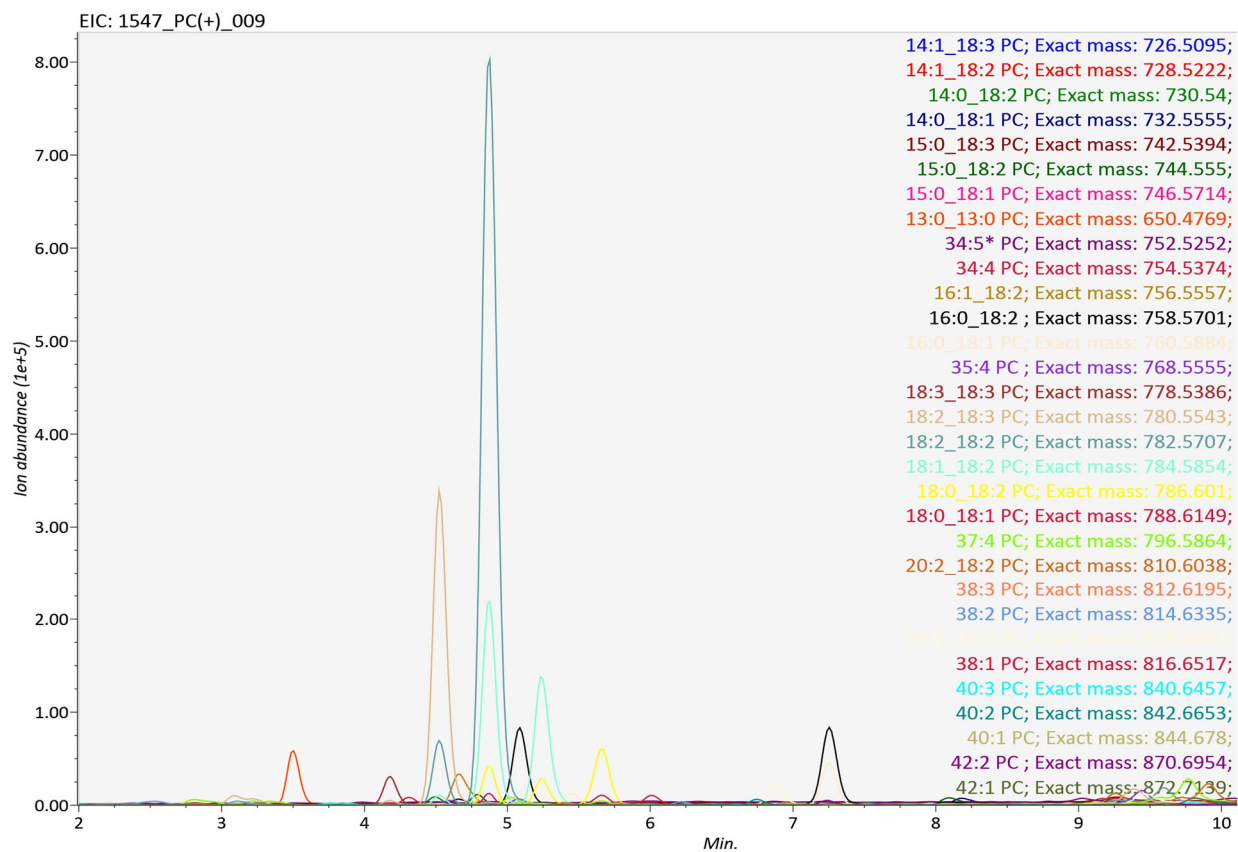

C. The example of spot plot of phosphatidylcholine molecular species after processing of SWATH data by MS-DIAL software (RIKEN, version 4.60)

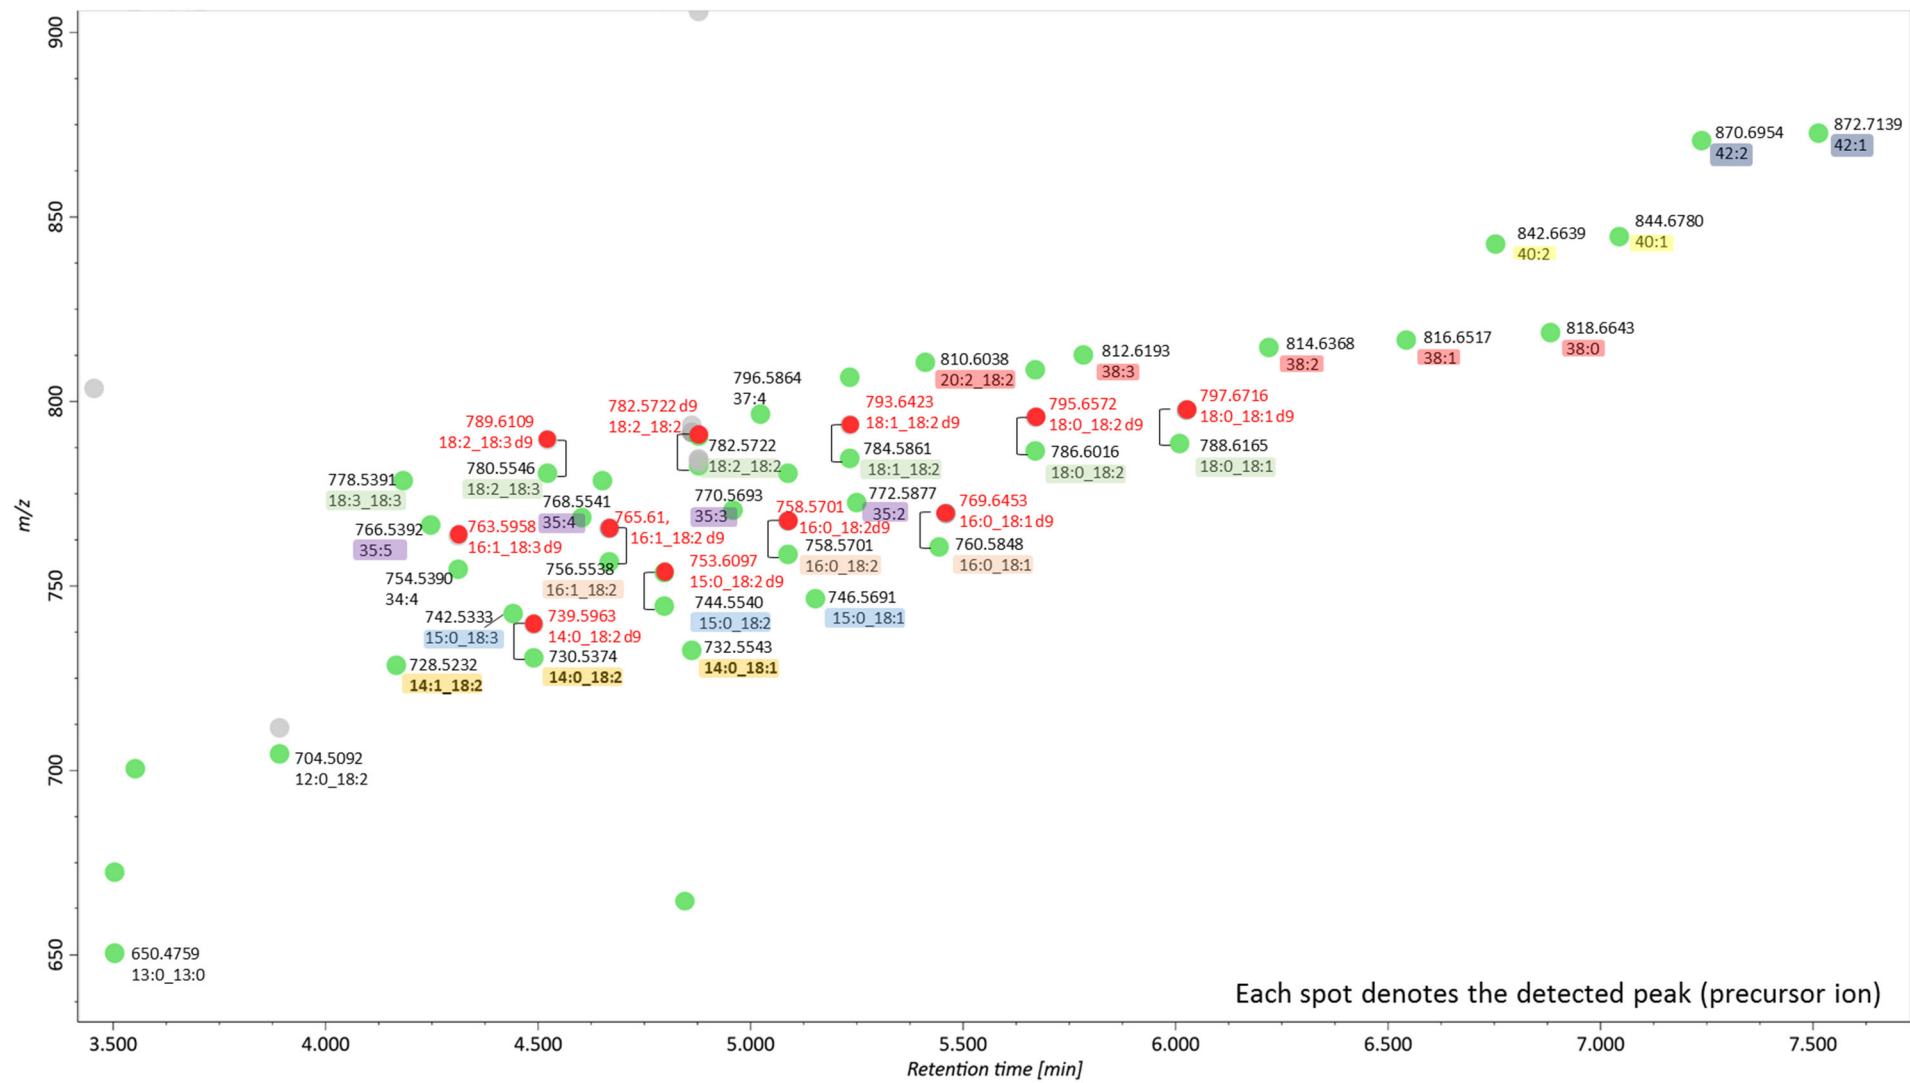

Supplement: s1 [file s1]
