# Supplementary material for: Heterogeneous Distribution of Phospholipid Molecular Species in the Surface Culture of Flammulina velutipes: New Facts about Lipids Containing α-Linolenic Fatty Acid
Source: MDPI journal article supplement (doi:10.3390/jof9010102), 2023-01-12
Supplement: s1 [file s1]

|              | [M+H] <sup>+</sup><br>experimental | [M+H] <sup>+</sup><br>theoretical | Delta   | RT, min | MS/MS fragments (Detected fragments are shown in bold) |               |               |               |               |               |
|--------------|------------------------------------|-----------------------------------|---------|---------|--------------------------------------------------------|---------------|---------------|---------------|---------------|---------------|
| 14:1_18:3 PC | 726.5095                           | 726.5074                          | 0.0022  | 3.84    | <b>184.07</b>                                          | 466.29        | 518.33        | 448.28        | 500.31        |               |
| 14:1_18:2 PC | 728.5222                           | 728.5231                          | -0.0008 | 4.17    | <b>184.07</b>                                          | <b>468.31</b> | 518.33        | 450.30        | 500.31        |               |
| 14:0_18:2 PC | 730.5400                           | 730.5387                          | 0.0014  | 4.49    | <b>184.07</b>                                          | 466.29        | 520.34        | 448.28        | 502.32        |               |
| 14:0_18:1 PC | 732.5555                           | 732.5543                          | 0.0013  | 4.86    | <b>184.07</b>                                          | <b>468.31</b> | 522.35        | <b>450.30</b> | 504.34        |               |
| 15:0_18:3 PC | 742.5394                           | 742.5387                          | 0.0008  | 4.43    | <b>184.07</b>                                          | <b>482.32</b> | 518.33        | 464.31        | 500.31        |               |
| 15:0_18:2 PC | 744.5550                           | 744.5543                          | 0.0008  | 4.80    | <b>184.07</b>                                          | <b>482.32</b> | <b>520.34</b> | <b>464.31</b> | <b>502.32</b> |               |
| 15:0_18:1 PC | 746.5714                           | 746.5700                          | 0.0015  | 5.14    | <b>184.07</b>                                          | <b>482.32</b> | <b>522.35</b> | <b>464.31</b> | <b>504.35</b> |               |
| 13:0_13:0 PC | 650.4769                           | 650.4761                          | 0.0008  | 3.49    | <b>184.07</b>                                          | <b>454.29</b> | <b>454.29</b> | <b>436.28</b> | <b>436.28</b> |               |
| 34:5* PC     | 752.5252                           | 752.5231                          | 0.0022  | 3.96    | <b>184.07</b>                                          |               |               |               |               |               |
| 34:4 PC      | 754.5374                           | 754.5387                          | -0.0012 | 4.31    | <b>184.07</b>                                          |               |               |               |               |               |
| 16:1_18:2    | 756.5557                           | 756.5543                          | 0.0014  | 4.72    | <b>184.07</b>                                          | <b>494.32</b> | 520.34        | 476.31        | <b>502.32</b> |               |
| 16:0_18:2    | 758.5701                           | 758.5700                          | 0.0002  | 5.07    | <b>184.07</b>                                          | <b>496.34</b> | <b>520.34</b> | <b>478.32</b> | <b>502.32</b> |               |
| 16:0_18:1 PC | 760.5884                           | 760.5856                          | 0.0028  | 5.44    | <b>184.07</b>                                          | <b>496.34</b> | <b>522.35</b> | <b>478.32</b> | <b>504.34</b> |               |
| 35:4 PC      | 768.5555                           | 768.5544                          | 0.0012  | 4.59    | <b>184.07</b>                                          |               |               |               |               |               |
| 18:3_18:3 PC | 778.5386                           | 778.5387                          | 0.0000  | 4.17    | <b>184.07</b>                                          | 518.32        | 518.33        | <b>500.31</b> | 500.31        |               |
| 18:2_18:3 PC | 780.5543                           | 780.5543                          | 0.0000  | 4.52    | <b>184.07</b>                                          | <b>520.34</b> | <b>518.33</b> | <b>502.32</b> | 500.31        |               |
| 18:2_18:2 PC | 782.5707                           | 782.5700                          | 0.0007  | 4.88    | <b>184.07</b>                                          | <b>520.34</b> | <b>520.34</b> | <b>502.32</b> | <b>502.32</b> |               |
| 18:1_18:2 PC | 784.5854                           | 784.5856                          | -0.0001 | 5.23    | <b>184.07</b>                                          | <b>522.35</b> | <b>520.34</b> | <b>504.34</b> | <b>502.32</b> |               |
| 18:0_18:2 PC | 786.6010                           | 786.6013                          | -0.0002 | 5.67    | <b>184.07</b>                                          | <b>524.37</b> | <b>520.34</b> | <b>506.36</b> | <b>502.32</b> |               |
| 18:0_18:1 PC | 788.6149                           | 788.6169                          | -0.0019 | 6.03    | <b>184.07</b>                                          | <b>524.37</b> | <b>522.35</b> | <b>506.36</b> | <b>504.34</b> |               |
| 37:4 PC      | 796.5864                           | 796.5857                          | 0.0008  | 5.02    | <b>184.07</b>                                          |               |               |               |               |               |
| 20:2_18:2 PC | 810.6038                           | 810.6013                          | 0.0026  | 5.41    | <b>184.07</b>                                          | <b>520.34</b> | <b>548.37</b> | <b>502.32</b> | <b>530.36</b> |               |
| 38:3 PC      | 812.6195                           | 812.6169                          | 0.0027  | 5.78    | <b>184.07</b>                                          |               |               |               |               |               |
| 38:2 PC      | 814.6335                           | 814.6326                          | 0.0010  | 6.22    | <b>184.07</b>                                          |               |               |               |               |               |
| 19:0_19:0 PC | 818.6642                           | 818.6633                          | 0.0009  | 6.87    | <b>184.07</b>                                          | <b>538.39</b> | <b>538.39</b> | <b>520.37</b> | <b>520.37</b> |               |
| 38:1 PC      | 816.6517                           | 816.6482                          | 0.0035  | 6.54    | <b>184.07</b>                                          |               |               |               |               |               |
| 40:3 PC      | 840.6457                           | 840.6482                          | -0.0025 | 6.45    | <b>184.07</b>                                          |               |               |               |               |               |
| 40:2 PC      | 842.6653                           | 842.6639                          | 0.0015  | 6.75    | <b>184.07</b>                                          |               |               |               |               |               |
| 40:1 PC      | 844.6780                           | 844.6796                          | -0.0015 | 7.04    | <b>184.07</b>                                          |               |               |               |               |               |
| 42:2 PC      | 870.6954                           | 870.6952                          | 0.0003  | 7.24    | <b>184.07</b>                                          |               |               |               |               |               |
| 42:1 PC      | 872.7139                           | 872.7109                          | 0.0031  | 7.51    | <b>184.07</b>                                          |               |               |               |               |               |
| 12:0_18:2 PE | 660.4597                           | 660.4604                          | -0.0007 | 4.02    | <b>519.44</b>                                          | <b>142.03</b> | 257.21        | 337.27        | 183.17        | 263.24        |
| 15:0_15:0 PE | 664.4940                           | 664.4917                          | 0.0023  | 4.83    | 523.4726                                               | <b>142.03</b> | 440.28        | 440.28        | 422.27        | 422.27        |
| 14:0_18:2 PE | 688.4962                           | 688.4917                          | 0.0045  | 4.619   | 547.4726                                               | <b>142.03</b> | <b>285.24</b> | <b>337.27</b> | <b>211.21</b> | <b>263.24</b> |
| 14:0_18:1 PE | 690.5040                           | 690.5074                          | -0.0034 | 4.99    | <b>549.49</b>                                          | <b>142.03</b> | 285.24        | 339.29        | 211.21        | 265.25        |
| 33:3 PE      | 700.4940                           | 700.4934                          | 0.0006  | 4.52    | <b>559.47</b>                                          | <b>142.03</b> | 299.26        | 335.26        | 225.22        | 261.22        |
| 15:0_18:2 PE | 702.4996                           | 702.5074                          | -0.0078 | 4.91    | <b>561.49</b>                                          | <b>142.03</b> | <b>299.26</b> | <b>337.27</b> | <b>225.22</b> | <b>263.24</b> |
| 34:4 PE      | 712.4954                           | 712.4917                          | 0.0037  | 4.41    | <b>571.47</b>                                          | <b>142.03</b> |               |               |               |               |
| 16:1_18:2 PE | 714.5063                           | 714.5074                          | -0.0011 | 4.81    | <b>573.49</b>                                          | <b>142.03</b> | <b>311.26</b> | <b>337.27</b> | <b>237.22</b> | <b>263.24</b> |
| 16:0_18:2 PE | 716.5256                           | 716.5230                          | 0.0026  | 5.20    | <b>575.50</b>                                          | <b>142.03</b> | <b>313.27</b> | <b>337.27</b> | <b>239.24</b> | <b>263.24</b> |
| 16:0_18:1 PE | 718.5395                           | 718.5387                          | 0.0008  | 5.57    | <b>577.52</b>                                          | <b>142.03</b> | 313.27        | <b>339.29</b> | <b>239.24</b> | <b>265.25</b> |
| 18:3_18:3 PE | 736.4929                           | 736.5074                          | -0.0145 | 4.30    | <b>595.49</b>                                          | <b>142.03</b> | 335.26        | 335.26        |               |               |
| 18:2_18:3 PE | 738.5099                           | 738.5074                          | 0.0025  | 4.65    | <b>597.49</b>                                          | <b>142.03</b> | <b>337.27</b> | <b>335.26</b> | <b>263.24</b> | <b>261.22</b> |
| 18:2_18:2 PE | 740.5245                           | 740.5230                          | 0.0015  | 4.99    | <b>599.50</b>                                          | <b>142.03</b> | <b>337.27</b> | <b>337.27</b> | <b>263.24</b> | <b>263.24</b> |
| 18:1_18:2 PE | 742.5401                           | 742.5387                          | 0.0014  | 5.35    | <b>601.52</b>                                          | <b>142.03</b> | <b>337.27</b> | <b>339.29</b> | <b>263.24</b> | <b>265.25</b> |
| 36:2 PE      | 744.5543                           | 744.5543                          | 0.0000  | 5.77    | <b>603.54</b>                                          | <b>142.03</b> |               |               |               |               |

\* For lipid species without detected fragments the number of carbon atoms and double bonds in the fatty acid side chains listed
