# Supplementary material for: Heterogeneous Distribution of Phospholipid Molecular Species in the Surface Culture of Flammulina velutipes: New Facts about Lipids Containing α-Linolenic Fatty Acid
Source: MDPI journal article supplement (doi:10.3390/jof9010102), 2023-01-12
Supplement: s1 [file s1]

**Table S3.** The content of phospholipid molecular species (% of mol. species in the lipid class)

| <b>[M+H]<sup>+</sup></b> | <b>Lipids</b> | <b>Center</b> | <b>Middle</b> | <b>Peripheral</b> |
|--------------------------|---------------|---------------|---------------|-------------------|
| 726.5095                 | 14:1_18:3 PC  | -             | 0.05          | -                 |
| 728.5222                 | 14:1_18:2 PC  | -             | 0.13          | -                 |
| 730.5400                 | 14:0_18:2 PC  | 0.68          | 0.52          | 0.37              |
| 732.5555                 | 14:0_18:1 PC  | -             | 0.08          | -                 |
| 742.5394                 | 15:0_18:3 PC  | -             | 0.08          | -                 |
| 744.5550                 | 15:0_18:2 PC  | 0.85          | 0.57          | 0.32*             |
| 746.5714                 | 15:0_18:1 PC  | -             | 0.07          | -                 |
| 752.5252                 | 34:5 PC       | -             | 0.05          | -                 |
| 754.5374                 | 34:4 PC       | 0.43          | 0.47          | 0.45              |
| 756.5557                 | 16:1_18:2 PC  | 2.82          | 2.39          | 1.66*             |
| 758.5701                 | 16:0_18:2 PC  | 5.72*         | 4.66          | 3.50              |
| 760.5884                 | 16:0_18:1 PC  | 0.72          | 0.67          | 0.63              |
| 768.5555                 | 35:4 PC       | 0.30          | 0.26          | -                 |
| 778.5386                 | 18:3_18:3 PC  | 1.17          | 1.64          | 5.17*             |
| 780.5543                 | 18:2_18:3 PC  | 13.74*        | 18.28*        | 27.45*            |
| 782.5707                 | 18:2_18:2 PC  | 53.35*        | 44.76         | 41.84             |
| 784.5854                 | 18:1_18:2 PC  | 7.32          | 8.48          | 7.02              |
| 786.6010                 | 18:0_18:2 PC  | 3.05          | 3.68          | 2.82              |
| 788.6149                 | 18:0_18:1 PC  | 0.49          | 0.68          | 0.43              |
| 796.5864                 | 37:4 PC       | 0.58          | 0.50          | -                 |
| 810.6038                 | 20:2_18:2 PC  | -             | 0.14          | 0.20              |
| 812.6195                 | 38:3 PC       | -             | 0.14          | 0.22              |
| 814.6335                 | 38:2 PC       | 0.24          | 0.23          | 0.20              |
| 816.6517                 | 38:1 PC       | -             | 0.06          | -                 |
| 840.6457                 | 40:3 PC       | -             | -             | 0.09              |
| 842.6653                 | 40:2 PC       | 0.34          | 0.37          | 0.33              |
| 844.6780                 | 40:1 PC       | -             | 0.10          | 0.06              |
| 870.6954                 | 42:2 PC       | 0.37          | 0.34          | 0.32              |
| 872.7139                 | 42:1 PC       | -             | 0.14          | 0.05              |
| 660.4597                 | 12:0_18:2 PE  | 1.82          | 1.43          | -                 |
| 688.4962                 | 14:0_18:2 PE  | -             | 1.69          | 0.94              |
| 690.5040                 | 14:0_18:1 PE  | -             | 0.23          | -                 |
| 700.4940                 | 33:3 PE       | -             | 0.25          | -                 |
| 702.4996                 | 15:0_18:2 PE  | -             | 2.88          | -                 |
| 712.4954                 | 34:4 PE       | -             | 0.86          | -                 |
| 714.5063                 | 16:1_18:2 PE  | 15.90*        | 9.28*         | 4.28*             |
| 716.5256                 | 16:0_18:2 PE  | 22.78*        | 18.49         | 18.74             |
| 718.5395                 | 16:0_18:1 PE  | -             | 1.32          | 0.91              |
| 736.4929                 | 18:3_18:3 PE  | -             | 0.29          | 1.72*             |
| 738.5099                 | 18:2_18:3 PE  | 4.93*         | 8.16*         | 17.14*            |
| 740.5245                 | 18:2_18:2 PE  | 39.33         | 45.18         | 40.67             |
| 742.5401                 | 18:1_18:2 PE  | 16.89         | 13.96         | 15.29             |
| 744.5543                 | 36:2 PE       | -             | 1.2           | 1.70              |

\* Lipids showing significant differences ( $p$ -value < 0.05) between zones as determined by Student's  $t$ -test
