# Supplementary material for: Heterogeneous Distribution of Phospholipid Molecular Species in the Surface Culture of Flammulina velutipes: New Facts about Lipids Containing α-Linolenic Fatty Acid
Source: MDPI journal article supplement (doi:10.3390/jof9010102), 2023-01-12
Supplement: s1 [file s1]

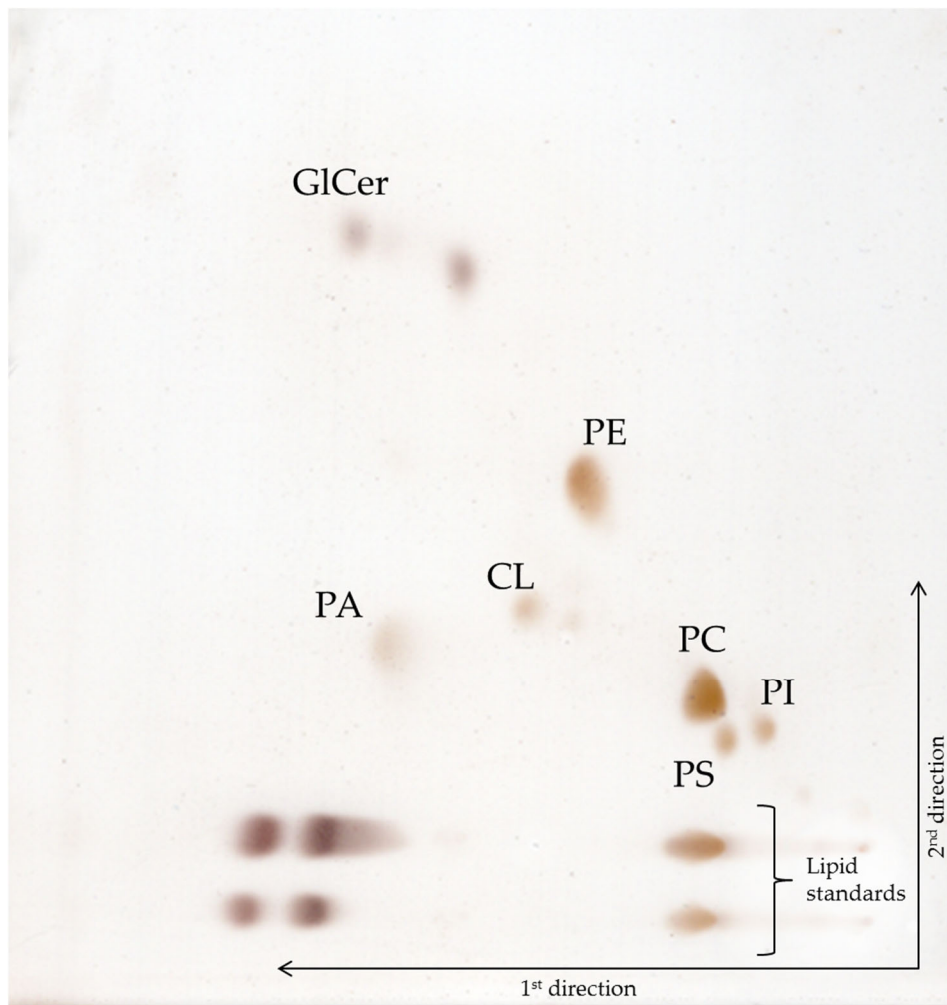

**Figure S1.** The typical TLC chromatogram of *F. velutipes* lipid extract obtained with two-dimensional TLC according to Bening et al. (1995) on silica gel 60 plates 10 × 10 cm (Merck, Germany).
